# Supplementary material for: "FHM" o cómo sacar partido a un presupuesto limitado
Source: Royal Society of Chemistry journal article supplement (doi:10.1039/d0sm00640h), 2006-01-01
Supplement: d0sm00640h1.pdf [file d0sm00640h1.pdf]

Electronic Supporting Information

## Crack density in bloodstains

Junhee Choi,<sup>a</sup> Wonjung Kim<sup>\*b</sup> and Ho-Young Kim<sup>\*a</sup>

- a. Department of Mechanical Engineering, Seoul National University, Seoul 08826, Republic of Korea.  
E-mail: [hyk@snu.ac.kr](mailto:hyk@snu.ac.kr)
- b. Department of Mechanical Engineering, Sogang University, Seoul 04107, Republic of Korea.  
E-mail: [wonjungkim@sogang.ac.kr](mailto:wonjungkim@sogang.ac.kr)

Table S1. Haematological data of the blood sample

|            |                           |
|------------|---------------------------|
| RBC        | 5.2 x 10 <sup>3</sup> /μl |
| WBC        | 6 x 10 <sup>3</sup> /μl   |
| Hb         | 13.3 g/dL                 |
| Hct        | 47.5%                     |
| MCV        | 89.3 fl                   |
| MCH        | 31 pg                     |
| Platelet   | 310 x 10 <sup>3</sup> /μl |
| PCT        | 0.29 fl                   |
| MPV        | 9.4 fl                    |
| PDW        | 10.1 fl                   |
| ANC        | 7882 /μl                  |
| Calcium    | 8.6 mg/dl                 |
| Phosphorus | 3.1 mg/dl                 |
| Glucose    | 110 mg/dl                 |
| BUN        | 11 mg/dl                  |
| Uric acid  | 6.7 mg/dl                 |
| Chol.      | 168 g/dl                  |
| T. Protein | 7 g/dl                    |
| Albumin    | 4.3 g/dl                  |
| T. Bil.    | 0.5 mg/dl                 |
| Alk. phos. | 44 IU/L                   |
| AST(GOT)   | 17 IU/L                   |
| ALT(GPT)   | 20 mg/dl                  |
| Creatinine | 1.13 mg/dl                |
| Na         | 139 mmol/l                |
| K          | 4.4 mmol/l                |
| Cl         | 105 mmol/l                |
| TCO2       | 26 mmol/l                 |
| HDL Chol.  | 29 mg/dl                  |
| LDL Chol.  | 52 mg/dl                  |
